# Supplementary material for: Effect of apparatus characteristics on anxiety-like behavior in young adult and old mice of both sexes assessed by the elevated plus maze assay
Source: Front Behav Neurosci. 2023 Aug 10;17:1182661. doi: 10.3389/fnbeh.2023.1182661 (PMC10450508; doi:10.3389/fnbeh.2023.1182661)
Supplement: Supplementary file 1 [file Data_Sheet_1.XLSX]

## Sheet: Figure 2
Figure 2A
Source of Variation	% of total variation	P value	P value summary	Significant?
Apparatus	73.79	<0.0001	****	Yes
Sex	0.7937	0.0417	*	Yes
Age	8.17	<0.0001	****	Yes
Apparatus x Sex	0.4779	0.1123	ns	No
Apparatus x Age	4.545	<0.0001	****	Yes
Sex x Age	0.08485	0.5008	ns	No
Apparatus x Sex x Age	0.08043	0.5122	ns	No
ANOVA table	SS (Type III)	DF	MS	F (DFn, DFd)	P value
Apparatus	1450	1	1450	F (1, 86) = 397.4	P<0.0001
Sex	15.6	1	15.6	F (1, 86) = 4.275	P=0.0417
Age	160.6	1	160.6	F (1, 86) = 44.00	P<0.0001
Apparatus x Sex	9.392	1	9.392	F (1, 86) = 2.574	P=0.1123
Apparatus x Age	89.31	1	89.31	F (1, 86) = 24.48	P<0.0001
Sex x Age	1.667	1	1.667	F (1, 86) = 0.4570	P=0.5008
Apparatus x Sex x Age	1.581	1	1.581	F (1, 86) = 0.4332	P=0.5122
Residual	313.8	86	3.649
Tukey's multiple comparisons test	Mean Diff.	95.00% CI of diff.	Below threshold?	Summary	Adjusted P Value
Stoelting+A26:A53:Young Male vs. Stoelting:Old Male	0.665	-1.792 to 3.122	No	ns	0.9902
Stoelting:Young Male vs. Stoelting:Young Female	-0.1917	-2.846 to 2.462	No	ns	>0.9999
Stoelting:Young Male vs. Stoelting:Old Female	0.4875	-2.009 to 2.984	No	ns	0.9987
Stoelting:Young Male vs. TopScan:Young Male	-9.016	-11.67 to -6.362	Yes	****	<0.0001
Stoelting:Young Male vs. TopScan:Old Male	-4.932	-7.389 to -2.475	Yes	****	<0.0001
Stoelting:Young Male vs. TopScan:Young Female	-11.01	-13.67 to -8.358	Yes	****	<0.0001
Stoelting:Young Male vs. TopScan:Old Female	-5.864	-8.360 to -3.368	Yes	****	<0.0001
Stoelting:Old Male vs. Stoelting:Young Female	-0.8567	-3.314 to 1.600	No	ns	0.9587
Stoelting:Old Male vs. Stoelting:Old Female	-0.1775	-2.463 to 2.108	No	ns	>0.9999
Stoelting:Old Male vs. TopScan:Young Male	-9.681	-12.14 to -7.224	Yes	****	<0.0001
Stoelting:Old Male vs. TopScan:Old Male	-5.597	-7.840 to -3.354	Yes	****	<0.0001
Stoelting:Old Male vs. TopScan:Young Female	-11.68	-14.13 to -9.220	Yes	****	<0.0001
Stoelting:Old Male vs. TopScan:Old Female	-6.529	-8.815 to -4.243	Yes	****	<0.0001
Stoelting:Young Female vs. Stoelting:Old Female	0.6792	-1.817 to 3.175	No	ns	0.9898
Stoelting:Young Female vs. TopScan:Young Male	-8.825	-11.48 to -6.171	Yes	****	<0.0001
Stoelting:Young Female vs. TopScan:Old Male	-4.74	-7.197 to -2.283	Yes	****	<0.0001
Stoelting:Young Female vs. TopScan:Young Female	-10.82	-13.47 to -8.166	Yes	****	<0.0001
Stoelting:Young Female vs. TopScan:Old Female	-5.672	-8.168 to -3.176	Yes	****	<0.0001
Stoelting:Old Female vs. TopScan:Young Male	-9.504	-12.00 to -7.008	Yes	****	<0.0001
Stoelting:Old Female vs. TopScan:Old Male	-5.42	-7.705 to -3.134	Yes	****	<0.0001
Stoelting:Old Female vs. TopScan:Young Female	-11.5	-14.00 to -9.003	Yes	****	<0.0001
Stoelting:Old Female vs. TopScan:Old Female	-6.351	-8.679 to -4.024	Yes	****	<0.0001
TopScan:Young Male vs. TopScan:Old Male	4.084	1.627 to 6.541	Yes	****	<0.0001
TopScan:Young Male vs. TopScan:Young Female	-1.995	-4.649 to 0.6586	No	ns	0.2868
TopScan:Young Male vs. TopScan:Old Female	3.153	0.6564 to 5.649	Yes	**	0.0042
TopScan:Old Male vs. TopScan:Young Female	-6.08	-8.537 to -3.623	Yes	****	<0.0001
TopScan:Old Male vs. TopScan:Old Female	-0.9318	-3.218 to 1.354	No	ns	0.9086
TopScan:Young Female vs. TopScan:Old Female	5.148	2.652 to 7.644	Yes	****	<0.0001
Figure 2B
Fixed effects (type III)	P value	P value summary	Statistically significant (P < 0.05)?	F (DFn, DFd)
Apparatus	<0.0001	****	Yes	F (1, 51) = 325.9
Age	<0.0001	****	Yes	F (1, 38) = 57.39
Apparatus x Age	<0.0001	****	Yes	F (1, 38) = 31.47
Šídák's multiple comparisons test	Predicted (LS) mean diff.	95.00% CI of diff.	Below threshold?	Summary	Adjusted P Value
Young - old
Stoelting	0.6663	-0.4467 to 1.779	No	ns	0.3135
TopScan	4.469	3.350 to 5.588	Yes	****	<0.0001
Figure 2C
Source of Variation	% of total variation	P value	P value summary	Significant?
Apparatus	58.65	<0.0001	****	Yes
Sex	1.663	0.0378	*	Yes
Age	5.719	0.0002	***	Yes
Apparatus x Sex	1.161	0.0815	ns	No
Apparatus x Age	3.816	0.002	**	Yes
Sex x Age	0.02863	0.7826	ns	No
Apparatus x Sex x Age	0.1337	0.5513	ns	No
ANOVA table	SS (Type III)	DF	MS	F (DFn, DFd)	P value
Apparatus	123.2	1	123.2	F (1, 86) = 157.0	P<0.0001
Sex	3.493	1	3.493	F (1, 86) = 4.450	P=0.0378
Age	12.02	1	12.02	F (1, 86) = 15.31	P=0.0002
Apparatus x Sex	2.439	1	2.439	F (1, 86) = 3.108	P=0.0815
Apparatus x Age	8.017	1	8.017	F (1, 86) = 10.21	P=0.0020
Sex x Age	0.06016	1	0.06016	F (1, 86) = 0.07664	P=0.7826
Apparatus x Sex x Age	0.2809	1	0.2809	F (1, 86) = 0.3578	P=0.5513
Residual	67.51	86	0.7849
Tukey's multiple comparisons test	Mean Diff.	95.00% CI of diff.	Below threshold?	Summary	Adjusted P Value
Stoelting:Young Male vs. Stoelting:Old Male	0.1919	-0.9478 to 1.332	No	ns	0.9995
Stoelting:Young Male vs. Stoelting:Young Female	-0.0047	-1.236 to 1.226	No	ns	>0.9999
Stoelting:Young Male vs. Stoelting:Old Female	0.06839	-1.089 to 1.226	No	ns	>0.9999
Stoelting:Young Male vs. TopScan:Young Male	-2.471	-3.702 to -1.240	Yes	****	<0.0001
Stoelting:Young Male vs. TopScan:Old Male	-1.318	-2.458 to -0.1786	Yes	*	0.0122
Stoelting:Young Male vs. TopScan:Young Female	-3.348	-4.579 to -2.117	Yes	****	<0.0001
Stoelting:Young Male vs. TopScan:Old Female	-1.872	-3.030 to -0.7146	Yes	****	<0.0001
Stoelting:Old Male vs. Stoelting:Young Female	-0.1966	-1.336 to 0.9431	No	ns	0.9994
Stoelting:Old Male vs. Stoelting:Old Female	-0.1235	-1.184 to 0.9367	No	ns	>0.9999
Stoelting:Old Male vs. TopScan:Young Male	-2.663	-3.802 to -1.523	Yes	****	<0.0001
Stoelting:Old Male vs. TopScan:Old Male	-1.51	-2.551 to -0.4698	Yes	***	0.0005
Stoelting:Old Male vs. TopScan:Young Female	-3.54	-4.680 to -2.401	Yes	****	<0.0001
Stoelting:Old Male vs. TopScan:Old Female	-2.064	-3.124 to -1.004	Yes	****	<0.0001
Stoelting:Young Female vs. Stoelting:Old Female	0.07309	-1.085 to 1.231	No	ns	>0.9999
Stoelting:Young Female vs. TopScan:Young Male	-2.466	-3.697 to -1.235	Yes	****	<0.0001
Stoelting:Young Female vs. TopScan:Old Male	-1.314	-2.453 to -0.1739	Yes	*	0.0127
Stoelting:Young Female vs. TopScan:Young Female	-3.344	-4.575 to -2.113	Yes	****	<0.0001
Stoelting:Young Female vs. TopScan:Old Female	-1.868	-3.025 to -0.7099	Yes	****	<0.0001
Stoelting:Old Female vs. TopScan:Young Male	-2.539	-3.697 to -1.381	Yes	****	<0.0001
Stoelting:Old Female vs. TopScan:Old Male	-1.387	-2.447 to -0.3264	Yes	**	0.0026
Stoelting:Old Female vs. TopScan:Young Female	-3.417	-4.574 to -2.259	Yes	****	<0.0001
Stoelting:Old Female vs. TopScan:Old Female	-1.941	-3.020 to -0.8611	Yes	****	<0.0001
TopScan:Young Male vs. TopScan:Old Male	1.152	0.01271 to 2.292	Yes	*	0.0455
TopScan:Young Male vs. TopScan:Young Female	-0.8777	-2.109 to 0.3533	No	ns	0.3533
TopScan:Young Male vs. TopScan:Old Female	0.5982	-0.5596 to 1.756	No	ns	0.7459
TopScan:Old Male vs. TopScan:Young Female	-2.03	-3.170 to -0.8904	Yes	****	<0.0001
TopScan:Old Male vs. TopScan:Old Female	-0.5541	-1.614 to 0.5060	No	ns	0.7347
TopScan:Young Female vs. TopScan:Old Female	1.476	0.3181 to 2.634	Yes	**	0.0037
Figure 2D
Two-way ANOVA	Ordinary
Alpha	0.05
Source of Variation	% of total variation	P value	P value summary	Significant?
Interaction	3.87	0.0022	**	Yes
Apparatus	58.48	<0.0001	****	Yes
Age	5.822	0.0002	***	Yes
ANOVA table	SS (Type III)	DF	MS	F (DFn, DFd)	P value
Interaction	8.13	1	8.13	F (1, 90) = 9.951	P=0.0022
Apparatus	122.9	1	122.9	F (1, 90) = 150.4	P<0.0001
Age	12.23	1	12.23	F (1, 90) = 14.97	P=0.0002
Residual	73.53	90	0.817
Šídák's multiple comparisons test	Predicted (LS) mean diff.	95.00% CI of diff.	Below threshold?	Summary	Adjusted P Value
Young - Old
Stoelting	0.1348	-0.4717 to 0.7413	No	ns	0.8514
CleverSys	1.324	0.7179 to 1.931	Yes	****	<0.0001
Figure 2E
Three-way ANOVA	Ordinary
Alpha	0.05
Source of Variation	% of total variation	P value	P value summary	Significant?
Apparatus	72.7	<0.0001	****	Yes
Sex	0.4322	0.1475	ns	No
Age	8.462	<0.0001	****	Yes
Apparatus x Sex	0.2256	0.2939	ns	No
Apparatus x Age	4.375	<0.0001	****	Yes
Sex x Age	0.1093	0.4643	ns	No
Apparatus x Sex x Age	0.05282	0.6107	ns	No
ANOVA table	SS (Type III)	DF	MS	F (DFn, DFd)	P value
Apparatus	727.9	1	727.9	F (1, 86) = 359.4	P<0.0001
Sex	4.327	1	4.327	F (1, 86) = 2.136	P=0.1475
Age	84.73	1	84.73	F (1, 86) = 41.83	P<0.0001
Apparatus x Sex	2.258	1	2.258	F (1, 86) = 1.115	P=0.2939
Apparatus x Age	43.81	1	43.81	F (1, 86) = 21.63	P<0.0001
Sex x Age	1.094	1	1.094	F (1, 86) = 0.5402	P=0.4643
Apparatus x Sex x Age	0.5289	1	0.5289	F (1, 86) = 0.2611	P=0.6107
Residual	174.2	86	2.025
Tukey's multiple comparisons test	Mean Diff.	95.00% CI of diff.	Below threshold?	Summary	Adjusted P Value
Stoelting:Young Male vs. Stoelting:Old Male	0.473	-1.358 to 2.304	No	ns	0.9925
Stoelting:Young Male vs. Stoelting:Young Female	-0.187	-2.164 to 1.790	No	ns	>0.9999
Stoelting:Young Male vs. Stoelting:Old Female	0.4191	-1.441 to 2.279	No	ns	0.9968
Stoelting:Young Male vs. TopScan:Young Male	-6.546	-8.523 to -4.568	Yes	****	<0.0001
Stoelting:Young Male vs. TopScan:Old Male	-3.614	-5.445 to -1.783	Yes	****	<0.0001
Stoelting:Young Male vs. TopScan:Young Female	-7.664	-9.641 to -5.686	Yes	****	<0.0001
Stoelting:Young Male vs. TopScan:Old Female	-3.992	-5.851 to -2.132	Yes	****	<0.0001
Stoelting:Old Male vs. Stoelting:Young Female	-0.66	-2.491 to 1.171	No	ns	0.9507
Stoelting:Old Male vs. Stoelting:Old Female	-0.05395	-1.757 to 1.649	No	ns	>0.9999
Stoelting:Old Male vs. TopScan:Young Male	-7.019	-8.850 to -5.188	Yes	****	<0.0001
Stoelting:Old Male vs. TopScan:Old Male	-4.087	-5.758 to -2.416	Yes	****	<0.0001
Stoelting:Old Male vs. TopScan:Young Female	-8.137	-9.967 to -6.306	Yes	****	<0.0001
Stoelting:Old Male vs. TopScan:Old Female	-4.465	-6.168 to -2.762	Yes	****	<0.0001
Stoelting:Young Female vs. Stoelting:Old Female	0.6061	-1.254 to 2.466	No	ns	0.9714
Stoelting:Young Female vs. TopScan:Young Male	-6.359	-8.336 to -4.381	Yes	****	<0.0001
Stoelting:Young Female vs. TopScan:Old Male	-3.427	-5.258 to -1.596	Yes	****	<0.0001
Stoelting:Young Female vs. TopScan:Young Female	-7.477	-9.454 to -5.499	Yes	****	<0.0001
Stoelting:Young Female vs. TopScan:Old Female	-3.805	-5.664 to -1.945	Yes	****	<0.0001
Stoelting:Old Female vs. TopScan:Young Male	-6.965	-8.825 to -5.105	Yes	****	<0.0001
Stoelting:Old Female vs. TopScan:Old Male	-4.033	-5.736 to -2.330	Yes	****	<0.0001
Stoelting:Old Female vs. TopScan:Young Female	-8.083	-9.942 to -6.223	Yes	****	<0.0001
Stoelting:Old Female vs. TopScan:Old Female	-4.411	-6.145 to -2.676	Yes	****	<0.0001
TopScan:Young Male vs. TopScan:Old Male	2.932	1.101 to 4.763	Yes	****	<0.0001
TopScan:Young Male vs. TopScan:Young Female	-1.118	-3.095 to 0.8596	No	ns	0.6508
TopScan:Young Male vs. TopScan:Old Female	2.554	0.6945 to 4.414	Yes	**	0.0013
TopScan:Old Male vs. TopScan:Young Female	-4.05	-5.880 to -2.219	Yes	****	<0.0001
TopScan:Old Male vs. TopScan:Old Female	-0.3776	-2.081 to 1.325	No	ns	0.9971
TopScan:Young Female vs. TopScan:Old Female	3.672	1.812 to 5.532	Yes	****	<0.0001
Figure 2F
Source of Variation	% of total variation	P value	P value summary	Significant?
Interaction	4.397	<0.0001	****	Yes
Apparatus	72.66	<0.0001	****	Yes
Age	8.502	<0.0001	****	Yes
ANOVA table	SS (Type III)	DF	MS	F (DFn, DFd)	P value
Interaction	44.03	1	44.03	F (1, 90) = 21.82	P<0.0001
Apparatus	727.6	1	727.6	F (1, 90) = 360.6	P<0.0001
Age	85.13	1	85.13	F (1, 90) = 42.19	P<0.0001
Residual	181.6	90	2.018
Šídák's multiple comparisons test	Predicted (LS) mean diff.	95.00% CI of diff.	Below threshold?	Summary	Adjusted P Value
Stoelting:Young vs. Stoelting:Old	0.5406	-0.5867 to 1.668	No	ns	0.7386
Stoelting:Young vs. CleverSys:Young	-7.011	-8.220 to -5.803	Yes	****	<0.0001
Stoelting:Young vs. CleverSys:Old	-3.702	-4.830 to -2.575	Yes	****	<0.0001
Stoelting:Old vs. CleverSys:Young	-7.552	-8.679 to -6.424	Yes	****	<0.0001
Stoelting:Old vs. CleverSys:Old	-4.243	-5.283 to -3.203	Yes	****	<0.0001
CleverSys:Young vs. CleverSys:Old	3.309	2.182 to 4.436	Yes	****	<0.0001

## Sheet: Figure 3
Figure 3A
Three-way ANOVA	Ordinary
Alpha	0.05
Source of Variation	% of total variation	P value	P value summary	Significant?
Apparatus	0.4197	0.483	ns	No
Sex	0.4995	0.4442	ns	No
Age	21.39	<0.0001	****	Yes
Apparatus x Sex	0.3598	0.5159	ns	No
Apparatus x Age	2.685	0.0782	ns	No
Sex x Age	0.2738	0.5708	ns	No
Apparatus x Sex x Age	0.6136	0.3966	ns	No
ANOVA table	SS (Type III)	DF	MS	F (DFn, DFd)	P value
Apparatus	17.89	1	17.89	F (1, 86) = 0.4965	P=0.4830
Sex	21.29	1	21.29	F (1, 86) = 0.5908	P=0.4442
Age	911.9	1	911.9	F (1, 86) = 25.30	P<0.0001
Apparatus x Sex	15.34	1	15.34	F (1, 86) = 0.4256	P=0.5159
Apparatus x Age	114.5	1	114.5	F (1, 86) = 3.176	P=0.0782
Sex x Age	11.67	1	11.67	F (1, 86) = 0.3238	P=0.5708
Apparatus x Sex x Age	26.16	1	26.16	F (1, 86) = 0.7258	P=0.3966
Residual	3100	86	36.04
Tukey's multiple comparisons test	Mean Diff.	95.00% CI of diff.	Below threshold?	Summary	Adjusted P Value
Stoelting:Young Male vs. Stoelting:Old Male	10.31	2.592 to 18.04	Yes	**	0.0019
Stoelting:Young Male vs. Stoelting:Young Female	0	-8.341 to 8.341	No	ns	>0.9999
Stoelting:Young Male vs. Stoelting:Old Female	6.754	-1.092 to 14.60	No	ns	0.1447
Stoelting:Young Male vs. TopScan:Young Male	1.6	-6.741 to 9.941	No	ns	0.9988
Stoelting:Young Male vs. TopScan:Old Male	5.314	-2.408 to 13.04	No	ns	0.3996
Stoelting:Young Male vs. TopScan:Young Female	1.1	-7.241 to 9.441	No	ns	>0.9999
Stoelting:Young Male vs. TopScan:Old Female	5.523	-2.322 to 13.37	No	ns	0.3698
Stoelting:Old Male vs. Stoelting:Young Female	-10.31	-18.04 to -2.592	Yes	**	0.0019
Stoelting:Old Male vs. Stoelting:Old Female	-3.56	-10.74 to 3.624	No	ns	0.7837
Stoelting:Old Male vs. TopScan:Young Male	-8.714	-16.44 to -0.9917	Yes	*	0.0159
Stoelting:Old Male vs. TopScan:Old Male	-5	-12.05 to 2.050	No	ns	0.3601
Stoelting:Old Male vs. TopScan:Young Female	-9.214	-16.94 to -1.492	Yes	**	0.0085
Stoelting:Old Male vs. TopScan:Old Female	-4.791	-11.98 to 2.393	No	ns	0.4411
Stoelting:Young Female vs. Stoelting:Old Female	6.754	-1.092 to 14.60	No	ns	0.1447
Stoelting:Young Female vs. TopScan:Young Male	1.6	-6.741 to 9.941	No	ns	0.9988
Stoelting:Young Female vs. TopScan:Old Male	5.314	-2.408 to 13.04	No	ns	0.3996
Stoelting:Young Female vs. TopScan:Young Female	1.1	-7.241 to 9.441	No	ns	>0.9999
Stoelting:Young Female vs. TopScan:Old Female	5.523	-2.322 to 13.37	No	ns	0.3698
Stoelting:Old Female vs. TopScan:Young Male	-5.154	-13.00 to 2.692	No	ns	0.4611
Stoelting:Old Female vs. TopScan:Old Male	-1.44	-8.624 to 5.744	No	ns	0.9985
Stoelting:Old Female vs. TopScan:Young Female	-5.654	-13.50 to 2.192	No	ns	0.3396
Stoelting:Old Female vs. TopScan:Old Female	-1.231	-8.547 to 6.085	No	ns	0.9995
TopScan:Young Male vs. TopScan:Old Male	3.714	-4.008 to 11.44	No	ns	0.8084
TopScan:Young Male vs. TopScan:Young Female	-0.5	-8.841 to 7.841	No	ns	>0.9999
TopScan:Young Male vs. TopScan:Old Female	3.923	-3.922 to 11.77	No	ns	0.776
TopScan:Old Male vs. TopScan:Young Female	-4.214	-11.94 to 3.508	No	ns	0.6901
TopScan:Old Male vs. TopScan:Old Female	0.2088	-6.975 to 7.393	No	ns	>0.9999
TopScan:Young Female vs. TopScan:Old Female	4.423	-3.422 to 12.27	No	ns	0.6538
Figure 3B
Two-way ANOVA	Ordinary
Alpha	0.05
Source of Variation	% of total variation	P value	P value summary	Significant?
Interaction	2.772	0.071	ns	No
Apparatus	0.4538	0.4617	ns	No
Age	21.61	<0.0001	****	Yes
ANOVA table	SS (Type III)	DF	MS	F (DFn, DFd)	P value
Interaction	118.2	1	118.2	F (1, 90) = 3.337	P=0.0710
Apparatus	19.35	1	19.35	F (1, 90) = 0.5464	P=0.4617
Age	921.4	1	921.4	F (1, 90) = 26.02	P<0.0001
Residual	3187	90	35.41
Šídák's multiple comparisons test	Predicted (LS) mean diff.	95.00% CI of diff.	Below threshold?	Summary	Adjusted P Value
Stoelting:Young vs. Stoelting:Old	8.6	3.877 to 13.32	Yes	****	<0.0001
Stoelting:Young vs. TopScan:Young	1.35	-3.712 to 6.412	No	ns	0.9791
Stoelting:Young vs. TopScan:Old	5.415	0.6923 to 10.14	Yes	*	0.0161
Stoelting:Old vs. TopScan:Young	-7.25	-11.97 to -2.527	Yes	***	0.0005
Stoelting:Old vs. TopScan:Old	-3.185	-7.542 to 1.171	No	ns	0.2755
TopScan:Young vs. TopScan:Old	4.065	-0.6577 to 8.787	No	ns	0.1296
Figure 3C
Unpaired t test with Welch's correction
P value	<0.0001
P value summary	****
Significantly different (P < 0.05)?	Yes
One- or two-tailed P value?	Two-tailed
Welch-corrected t, df	t=5.122, df=88.73
Figure 3D
Three-way ANOVA	Ordinary
Alpha	0.05
Source of Variation	% of total variation	P value	P value summary	Significant?
Apparatus	2.186	0.0347	*	Yes
Sex	0.03223	0.7951	ns	No
Age	53.17	<0.0001	****	Yes
Apparatus x Sex	1.292	0.1028	ns	No
Apparatus x Age	2.969	0.0143	*	Yes
Sex x Age	0.05567	0.7329	ns	No
Apparatus x Sex x Age	0.007317	0.9015	ns	No
ANOVA table	SS (Type III)	DF	MS	F (DFn, DFd)	P value
Apparatus	210.1	1	210.1	F (1, 86) = 4.604	P=0.0347
Sex	3.098	1	3.098	F (1, 86) = 0.06788	P=0.7951
Age	5110	1	5110	F (1, 86) = 112.0	P<0.0001
Apparatus x Sex	124.1	1	124.1	F (1, 86) = 2.720	P=0.1028
Apparatus x Age	285.4	1	285.4	F (1, 86) = 6.251	P=0.0143
Sex x Age	5.351	1	5.351	F (1, 86) = 0.1172	P=0.7329
Apparatus x Sex x Age	0.7033	1	0.7033	F (1, 86) = 0.01541	P=0.9015
Residual	3926	86	45.65
Tukey's multiple comparisons test	Mean Diff.	95.00% CI of diff.	Below threshold?	Summary	Adjusted P Value
Stoelting:Young Male vs. Stoelting:Old Male	19.1	10.41 to 27.79	Yes	****	<0.0001
Stoelting:Young Male vs. Stoelting:Young Female	-1.3	-10.69 to 8.087	No	ns	0.9999
Stoelting:Young Male vs. Stoelting:Old Female	16.48	7.656 to 25.31	Yes	****	<0.0001
Stoelting:Young Male vs. TopScan:Young Male	4.4	-4.987 to 13.79	No	ns	0.828
Stoelting:Young Male vs. TopScan:Old Male	16.1	7.409 to 24.79	Yes	****	<0.0001
Stoelting:Young Male vs. TopScan:Young Female	7.4	-1.987 to 16.79	No	ns	0.2318
Stoelting:Young Male vs. TopScan:Old Female	18.48	9.656 to 27.31	Yes	****	<0.0001
Stoelting:Old Male vs. Stoelting:Young Female	-20.4	-29.09 to -11.71	Yes	****	<0.0001
Stoelting:Old Male vs. Stoelting:Old Female	-2.615	-10.70 to 5.469	No	ns	0.9725
Stoelting:Old Male vs. TopScan:Young Male	-14.7	-23.39 to -6.009	Yes	****	<0.0001
Stoelting:Old Male vs. TopScan:Old Male	-3	-10.93 to 4.934	No	ns	0.9369
Stoelting:Old Male vs. TopScan:Young Female	-11.7	-20.39 to -3.009	Yes	**	0.0017
Stoelting:Old Male vs. TopScan:Old Female	-0.6154	-8.700 to 7.469	No	ns	>0.9999
Stoelting:Young Female vs. Stoelting:Old Female	17.78	8.956 to 26.61	Yes	****	<0.0001
Stoelting:Young Female vs. TopScan:Young Male	5.7	-3.687 to 15.09	No	ns	0.5638
Stoelting:Young Female vs. TopScan:Old Male	17.4	8.709 to 26.09	Yes	****	<0.0001
Stoelting:Young Female vs. TopScan:Young Female	8.7	-0.6873 to 18.09	No	ns	0.0897
Stoelting:Young Female vs. TopScan:Old Female	19.78	10.96 to 28.61	Yes	****	<0.0001
Stoelting:Old Female vs. TopScan:Young Male	-12.08	-20.91 to -3.256	Yes	**	0.0013
Stoelting:Old Female vs. TopScan:Old Male	-0.3846	-8.469 to 7.700	No	ns	>0.9999
Stoelting:Old Female vs. TopScan:Young Female	-9.085	-17.91 to -0.2555	Yes	*	0.0391
Stoelting:Old Female vs. TopScan:Old Female	2	-6.233 to 10.23	No	ns	0.9949
TopScan:Young Male vs. TopScan:Old Male	11.7	3.009 to 20.39	Yes	**	0.0017
TopScan:Young Male vs. TopScan:Young Female	3	-6.387 to 12.39	No	ns	0.9743
TopScan:Young Male vs. TopScan:Old Female	14.08	5.256 to 22.91	Yes	****	<0.0001
TopScan:Old Male vs. TopScan:Young Female	-8.7	-17.39 to -0.009095	Yes	*	0.0496
TopScan:Old Male vs. TopScan:Old Female	2.385	-5.700 to 10.47	No	ns	0.9837
TopScan:Young Female vs. TopScan:Old Female	11.08	2.256 to 19.91	Yes	**	0.0045
Figure 3E
Two-way ANOVA	Ordinary
Alpha	0.05
Source of Variation	% of total variation	P value	P value summary	Significant?
Interaction	3.049	0.0125	*	Yes
Apparatus	2.121	0.0363	*	Yes
Age	53.21	<0.0001	****	Yes
ANOVA table	SS (Type III)	DF	MS	F (DFn, DFd)
Interaction	293.1	1	293.1	F (1, 90) = 6.491
Apparatus	203.9	1	203.9	F (1, 90) = 4.516
Age	5115	1	5115	F (1, 90) = 113.3
Residual	4064	90	45.15
Šídák's multiple comparisons test	Predicted (LS) mean diff.	95.00% CI of diff.	Below threshold?	Summary	Adjusted P Value
Stoelting:Young vs. Stoelting:Old	18.49	13.16 to 23.82	Yes	****	<0.0001
Stoelting:Young vs. TopScan:Young	6.55	0.8338 to 12.27	Yes	*	0.0162
Stoelting:Young vs. TopScan:Old	17.9	12.57 to 23.23	Yes	****	<0.0001
Stoelting:Old vs. TopScan:Young	-11.94	-17.27 to -6.608	Yes	****	<0.0001
Stoelting:Old vs. TopScan:Old	-0.5926	-5.512 to 4.327	No	ns	0.9997
TopScan:Young vs. TopScan:Old	11.35	6.015 to 16.68	Yes	****	<0.0001
Figure 3F
Unpaired t test with Welch's correction
P value	<0.0001
P value summary	****
Significantly different (P < 0.05)?	Yes
One- or two-tailed P value?	Two-tailed
Welch-corrected t, df	t=9.073, df=54.05
Figure 3G
Three-way ANOVA	Ordinary
Alpha	0.05
Source of Variation	% of total variation	P value	P value summary	Significant?
Apparatus	7.538	0.0049	**	Yes
Sex	1.87	0.1541	ns	No
Age	7.934	0.004	**	Yes
Apparatus x Sex	2.837e-06	0.9986	ns	No
Apparatus x Age	1.28	0.2375	ns	No
Sex x Age	1.126	0.2676	ns	No
Apparatus x Sex x Age	0.8826	0.326	ns	No
ANOVA table	SS (Type III)	DF	MS	F (DFn, DFd)	P value
Apparatus	1028	1	1028	F (1, 86) = 8.335	P=0.0049
Sex	255	1	255	F (1, 86) = 2.067	P=0.1541
Age	1082	1	1082	F (1, 86) = 8.773	P=0.0040
Apparatus x Sex	0.0003869	1	0.0003869	F (1, 86) = 3.137e-006	P=0.9986
Apparatus x Age	174.5	1	174.5	F (1, 86) = 1.415	P=0.2375
Sex x Age	153.6	1	153.6	F (1, 86) = 1.245	P=0.2676
Apparatus x Sex x Age	120.4	1	120.4	F (1, 86) = 0.9759	P=0.3260
Residual	10609	86	123.4
Tukey's multiple comparisons test	Mean Diff.	95.00% CI of diff.	Below threshold?	Summary	Adjusted P Value
Stoelting:Young Male vs. Stoelting:Old Male	0.7678	-13.52 to 15.06	No	ns	>0.9999
Stoelting:Young Male vs. Stoelting:Young Female	1.548	-13.88 to 16.98	No	ns	>0.9999
Stoelting:Young Male vs. Stoelting:Old Female	-7.436	-21.95 to 7.078	No	ns	0.7539
Stoelting:Young Male vs. TopScan:Young Male	-1.641	-17.07 to 13.79	No	ns	>0.9999
Stoelting:Young Male vs. TopScan:Old Male	-10.97	-25.25 to 3.322	No	ns	0.2622
Stoelting:Young Male vs. TopScan:Young Female	-4.681	-20.11 to 10.75	No	ns	0.9809
Stoelting:Young Male vs. TopScan:Old Female	-14.6	-29.11 to -0.08432	Yes	*	0.0476
Stoelting:Old Male vs. Stoelting:Young Female	0.7797	-13.51 to 15.07	No	ns	>0.9999
Stoelting:Old Male vs. Stoelting:Old Female	-8.204	-21.49 to 5.087	No	ns	0.5428
Stoelting:Old Male vs. TopScan:Young Male	-2.409	-16.70 to 11.88	No	ns	0.9995
Stoelting:Old Male vs. TopScan:Old Male	-11.73	-24.78 to 1.309	No	ns	0.1098
Stoelting:Old Male vs. TopScan:Young Female	-5.449	-19.74 to 8.839	No	ns	0.9342
Stoelting:Old Male vs. TopScan:Old Female	-15.37	-28.66 to -2.076	Yes	*	0.0122
Stoelting:Young Female vs. Stoelting:Old Female	-8.984	-23.50 to 5.531	No	ns	0.5393
Stoelting:Young Female vs. TopScan:Young Male	-3.188	-18.62 to 12.24	No	ns	0.9981
Stoelting:Young Female vs. TopScan:Old Male	-12.51	-26.80 to 1.774	No	ns	0.1304
Stoelting:Young Female vs. TopScan:Young Female	-6.228	-21.66 to 9.204	No	ns	0.9129
Stoelting:Young Female vs. TopScan:Old Female	-16.15	-30.66 to -1.632	Yes	*	0.0185
Stoelting:Old Female vs. TopScan:Young Male	5.795	-8.719 to 20.31	No	ns	0.9173
Stoelting:Old Female vs. TopScan:Old Male	-3.529	-16.82 to 9.761	No	ns	0.9912
Stoelting:Old Female vs. TopScan:Young Female	2.755	-11.76 to 17.27	No	ns	0.9989
Stoelting:Old Female vs. TopScan:Old Female	-7.163	-20.70 to 6.372	No	ns	0.7223
TopScan:Young Male vs. TopScan:Old Male	-9.325	-23.61 to 4.962	No	ns	0.4698
TopScan:Young Male vs. TopScan:Young Female	-3.04	-18.47 to 12.39	No	ns	0.9986
TopScan:Young Male vs. TopScan:Old Female	-12.96	-27.47 to 1.557	No	ns	0.1155
TopScan:Old Male vs. TopScan:Young Female	6.285	-8.002 to 20.57	No	ns	0.8696
TopScan:Old Male vs. TopScan:Old Female	-3.633	-16.92 to 9.658	No	ns	0.9896
TopScan:Young Female vs. TopScan:Old Female	-9.918	-24.43 to 4.596	No	ns	0.4089
Figure 3H
Fixed effects (type III)	P value	P value summary	Statistically significant (P < 0.05)?	F (DFn, DFd)
Apparatus	0.0059	**	Yes	F (1, 52) = 8.256
Age	0.0062	**	Yes	F (1, 38) = 8.407
Apparatus x Age	0.2341	ns	No	F (1, 38) = 1.462
Šídák's multiple comparisons test	Predicted (LS) mean diff.	95.00% CI of diff.	Below threshold?	Summary	Adjusted P Value
Young - Old
Stoelting	-3.906	-11.52 to 3.703	No	ns	0.4215
TopScan	-9.495	-17.11 to -1.886	Yes	*	0.0121
Figure 3I
Unpaired t test with Welch's correction
P value	0.0039
P value summary	**
Significantly different (P < 0.05)?	Yes
One- or two-tailed P value?	Two-tailed
Welch-corrected t, df	t=2.983, df=68.58

## Sheet: Figure 4
Figure 4A
Source of Variation	% of total variation	P value	P value summary	Significant?
Apparatus	1.03	0.3295	ns	No
Sex	0.007752	0.9324	ns	No
Age	4.567	0.042	*	Yes
Apparatus x Sex	0.653	0.4371	ns	No
Apparatus x Age	0.5977	0.4572	ns	No
Sex x Age	0.1749	0.6872	ns	No
Apparatus x Sex x Age	0.2772	0.6123	ns	No
ANOVA table	SS (Type III)	DF	MS	F (DFn, DFd)	P value
Apparatus	1640	1	1640	F (1, 86) = 0.9618	P=0.3295
Sex	12.34	1	12.34	F (1, 86) = 0.007235	P=0.9324
Age	7270	1	7270	F (1, 86) = 4.262	P=0.0420
Apparatus x Sex	1040	1	1040	F (1, 86) = 0.6095	P=0.4371
Apparatus x Age	951.5	1	951.5	F (1, 86) = 0.5578	P=0.4572
Sex x Age	278.4	1	278.4	F (1, 86) = 0.1632	P=0.6872
Apparatus x Sex x Age	441.2	1	441.2	F (1, 86) = 0.2587	P=0.6123
Residual	146686	86	1706
Two-stage linear step-up procedure of Benjamini, Krieger and Yekutieli	Mean Diff.	Discovery?	q value	Individual P Value
Stoelting:Young Male vs. Stoelting:Old Male	-10.45	No	0.9383	0.5426
Stoelting:Young Male vs. Stoelting:Young Female	-6.56	No	0.9648	0.7233
Stoelting:Young Male vs. Stoelting:Old Female	-18.82	No	0.8863	0.2817
Stoelting:Young Male vs. TopScan:Young Male	-4.36	No	0.9648	0.8139
Stoelting:Young Male vs. TopScan:Old Male	-36.45	No	0.5846	0.0359
Stoelting:Young Male vs. TopScan:Young Female	-6.23	No	0.9648	0.7367
Stoelting:Young Male vs. TopScan:Old Female	-22.59	No	0.8863	0.1969
Stoelting:Old Male vs. Stoelting:Young Female	3.894	No	0.9648	0.8204
Stoelting:Old Male vs. Stoelting:Old Female	-8.363	No	0.9648	0.6004
Stoelting:Old Male vs. TopScan:Young Male	6.094	No	0.9648	0.7224
Stoelting:Old Male vs. TopScan:Old Male	-26	No	0.5846	0.0994
Stoelting:Old Male vs. TopScan:Young Female	4.224	No	0.9648	0.8055
Stoelting:Old Male vs. TopScan:Old Female	-12.14	No	0.8863	0.4475
Stoelting:Young Female vs. Stoelting:Old Female	-12.26	No	0.8863	0.4824
Stoelting:Young Female vs. TopScan:Young Male	2.2	No	>0.9999	0.9055
Stoelting:Young Female vs. TopScan:Old Male	-29.89	No	0.5846	0.084
Stoelting:Young Female vs. TopScan:Young Female	0.33	No	>0.9999	0.9858
Stoelting:Young Female vs. TopScan:Old Female	-16.03	No	0.8863	0.3586
Stoelting:Old Female vs. TopScan:Young Male	14.46	No	0.8863	0.4076
Stoelting:Old Female vs. TopScan:Old Male	-17.64	No	0.8863	0.2706
Stoelting:Old Female vs. TopScan:Young Female	12.59	No	0.8863	0.4707
Stoelting:Old Female vs. TopScan:Old Female	-3.777	No	0.9648	0.8162
TopScan:Young Male vs. TopScan:Old Male	-32.09	No	0.5846	0.0639
TopScan:Young Male vs. TopScan:Young Female	-1.87	No	>0.9999	0.9196
TopScan:Young Male vs. TopScan:Old Female	-18.23	No	0.8863	0.2968
TopScan:Old Male vs. TopScan:Young Female	30.22	No	0.5846	0.0807
TopScan:Old Male vs. TopScan:Old Female	13.86	No	0.8863	0.386
TopScan:Young Female vs. TopScan:Old Female	-16.36	No	0.8863	0.3488
Figure 4B
Source of Variation	% of total variation	P value	P value summary	Significant?
Interaction	0.6318	0.4374	ns	No
Apparatus	1.075	0.3116	ns	No
Age	4.58	0.0385	*	Yes
ANOVA table	SS (Type III)	DF	MS	F (DFn, DFd)	P value
Interaction	1007	1	1007	F (1, 90) = 0.6086	P=0.4374
Apparatus	1713	1	1713	F (1, 90) = 1.036	P=0.3116
Age	7296	1	7296	F (1, 90) = 4.412	P=0.0385
Residual	148846	90	1654
Uncorrected Fisher's LSD	Predicted (LS) mean diff.	95.00% CI of diff.	Below threshold?	Summary	Individual P Value
Young - Old
Stoelting	-11.2	-35.04 to 12.63	No	ns	0.353
TopScan	-24.44	-48.27 to -0.6020	Yes	*	0.0446
Figure 4C
Unpaired t test with Welch's correction
P value	0.0248
P value summary	*
Significantly different (P < 0.05)?	Yes
One- or two-tailed P value?	Two-tailed
Welch-corrected t, df	t=2.285, df=84.67
Figure 4D
Three-way ANOVA	Ordinary
Alpha	0.05
Source of Variation	% of total variation	P value	P value summary	Significant?
Apparatus	11.3	0.0013	**	Yes
Sex	0.09041	0.7667	ns	No
Age	0.02041	0.8879	ns	No
Apparatus x Sex	0.02051	0.8876	ns	No
Apparatus x Age	2.277e-06	0.9988	ns	No
Sex x Age	0.2196	0.6439	ns	No
Apparatus x Sex x Age	0.1742	0.6805	ns	No
ANOVA table	SS (Type III)	DF	MS	F (DFn, DFd)	P value
Apparatus	24444	1	24444	F (1, 86) = 11.08	P=0.0013
Sex	195.5	1	195.5	F (1, 86) = 0.08860	P=0.7667
Age	44.14	1	44.14	F (1, 86) = 0.02000	P=0.8879
Apparatus x Sex	44.35	1	44.35	F (1, 86) = 0.02010	P=0.8876
Apparatus x Age	0.004924	1	0.004924	F (1, 86) = 2.231e-006	P=0.9988
Sex x Age	475	1	475	F (1, 86) = 0.2152	P=0.6439
Apparatus x Sex x Age	376.6	1	376.6	F (1, 86) = 0.1707	P=0.6805
Residual	189782	86	2207
Tukey's multiple comparisons test	Mean Diff.	95.00% CI of diff.	Below threshold?	Summary	Adjusted P Value
Stoelting:Young Male vs. Stoelting:Old Male	-7.226	-67.65 to 53.20	No	ns	>0.9999
Stoelting:Young Male vs. Stoelting:Young Female	-4.29	-69.56 to 60.98	No	ns	>0.9999
Stoelting:Young Male vs. Stoelting:Old Female	5.679	-55.71 to 67.07	No	ns	>0.9999
Stoelting:Young Male vs. TopScan:Young Male	29.95	-35.32 to 95.22	No	ns	0.8429
Stoelting:Young Male vs. TopScan:Old Male	30.85	-29.57 to 91.28	No	ns	0.7571
Stoelting:Young Male vs. TopScan:Young Female	30.98	-34.29 to 96.25	No	ns	0.8186
Stoelting:Young Male vs. TopScan:Old Female	32.88	-28.51 to 94.27	No	ns	0.71
Stoelting:Old Male vs. Stoelting:Young Female	2.936	-57.49 to 63.36	No	ns	>0.9999
Stoelting:Old Male vs. Stoelting:Old Female	12.9	-43.31 to 69.12	No	ns	0.9964
Stoelting:Old Male vs. TopScan:Young Male	37.18	-23.25 to 97.60	No	ns	0.5471
Stoelting:Old Male vs. TopScan:Old Male	38.08	-17.08 to 93.24	No	ns	0.3955
Stoelting:Old Male vs. TopScan:Young Female	38.21	-22.22 to 98.63	No	ns	0.5117
Stoelting:Old Male vs. TopScan:Old Female	40.1	-16.11 to 96.32	No	ns	0.3525
Stoelting:Young Female vs. Stoelting:Old Female	9.969	-51.42 to 71.36	No	ns	0.9996
Stoelting:Young Female vs. TopScan:Young Male	34.24	-31.03 to 99.51	No	ns	0.7311
Stoelting:Young Female vs. TopScan:Old Male	35.14	-25.28 to 95.57	No	ns	0.6172
Stoelting:Young Female vs. TopScan:Young Female	35.27	-30.00 to 100.5	No	ns	0.7007
Stoelting:Young Female vs. TopScan:Old Female	37.17	-24.22 to 98.56	No	ns	0.5674
Stoelting:Old Female vs. TopScan:Young Male	24.27	-37.12 to 85.66	No	ns	0.9212
Stoelting:Old Female vs. TopScan:Old Male	25.17	-31.04 to 81.39	No	ns	0.8588
Stoelting:Old Female vs. TopScan:Young Female	25.3	-36.09 to 86.69	No	ns	0.9036
Stoelting:Old Female vs. TopScan:Old Female	27.2	-30.05 to 84.45	No	ns	0.8178
TopScan:Young Male vs. TopScan:Old Male	0.9029	-59.52 to 61.33	No	ns	>0.9999
TopScan:Young Male vs. TopScan:Young Female	1.03	-64.24 to 66.30	No	ns	>0.9999
TopScan:Young Male vs. TopScan:Old Female	2.929	-58.46 to 64.32	No	ns	>0.9999
TopScan:Old Male vs. TopScan:Young Female	0.1271	-60.30 to 60.55	No	ns	>0.9999
TopScan:Old Male vs. TopScan:Old Female	2.026	-54.19 to 58.24	No	ns	>0.9999
TopScan:Young Female vs. TopScan:Old Female	1.899	-59.49 to 63.29	No	ns	>0.9999
Figure 4E
Two-way ANOVA	Ordinary
Alpha	0.05
Source of Variation	% of total variation	P value	P value summary	Significant?
Interaction	0.0001414	0.9904	ns	No
Apparatus	11.38	0.001	***	Yes
Age	0.01655	0.897	ns	No
ANOVA table	SS (Type III)	DF	MS	F (DFn, DFd)	P value
Interaction	0.3059	1	0.3059	F (1, 90) = 0.0001441	P=0.9904
Apparatus	24609	1	24609	F (1, 90) = 11.59	P=0.0010
Age	35.8	1	35.8	F (1, 90) = 0.01687	P=0.8970
Residual	191030	90	2123
Šídák's multiple comparisons test	Predicted (LS) mean diff.	95.00% CI of diff.	Below threshold?	Summary	Adjusted P Value
Stoelting:Young vs. Stoelting:Old	1.133	-35.43 to 37.70	No	ns	>0.9999
Stoelting:Young vs. TopScan:Young	32.61	-6.583 to 71.80	No	ns	0.1549
Stoelting:Young vs. TopScan:Old	33.97	-2.591 to 70.54	No	ns	0.0825
Stoelting:Old vs. TopScan:Young	31.48	-5.087 to 68.04	No	ns	0.1294
Stoelting:Old vs. TopScan:Old	32.84	-0.8911 to 66.57	No	ns	0.0605
TopScan:Young vs. TopScan:Old	1.364	-35.20 to 37.93	No	ns	>0.9999
Figure 4F
Unpaired t test with Welch's correction
P value	0.8945
P value summary	ns
Significantly different (P < 0.05)?	No
One- or two-tailed P value?	Two-tailed
Welch-corrected t, df	t=0.1331, df=87.44
Figure 4G
Three-way ANOVA	Ordinary
Alpha	0.05
Source of Variation	% of total variation	P value	P value summary	Significant?
Apparatus	1.024	0.3311	ns	No
Sex	0.008244	0.9303	ns	No
Age	4.551	0.0424	*	Yes
Apparatus x Sex	0.648	0.439	ns	No
Apparatus x Age	0.5929	0.4591	ns	No
Sex x Age	0.1724	0.6893	ns	No
Apparatus x Sex x Age	0.274	0.6144	ns	No
ANOVA table	SS (Type III)	DF	MS	F (DFn, DFd)	P value
Apparatus	181.3	1	181.3	F (1, 86) = 0.9553	P=0.3311
Sex	1.459	1	1.459	F (1, 86) = 0.007691	P=0.9303
Age	805.7	1	805.7	F (1, 86) = 4.246	P=0.0424
Apparatus x Sex	114.7	1	114.7	F (1, 86) = 0.6046	P=0.4390
Apparatus x Age	105	1	105	F (1, 86) = 0.5532	P=0.4591
Sex x Age	30.53	1	30.53	F (1, 86) = 0.1609	P=0.6893
Apparatus x Sex x Age	48.51	1	48.51	F (1, 86) = 0.2556	P=0.6144
Residual	16318	86	189.7
Tukey's multiple comparisons test	Mean Diff.	95.00% CI of diff.	Below threshold?	Summary	Adjusted P Value
Stoelting:Young Male vs. Stoelting:Old Male	-3.485	-21.20 to 14.23	No	ns	0.9986
Stoelting:Young Male vs. Stoelting:Young Female	-2.187	-21.33 to 16.95	No	ns	>0.9999
Stoelting:Young Male vs. Stoelting:Old Female	-6.272	-24.27 to 11.73	No	ns	0.9588
Stoelting:Young Male vs. TopScan:Young Male	-1.453	-20.59 to 17.69	No	ns	>0.9999
Stoelting:Young Male vs. TopScan:Old Male	-12.12	-29.84 to 5.599	No	ns	0.4075
Stoelting:Young Male vs. TopScan:Young Female	-2.077	-21.22 to 17.06	No	ns	>0.9999
Stoelting:Young Male vs. TopScan:Old Female	-7.531	-25.53 to 10.47	No	ns	0.8965
Stoelting:Old Male vs. Stoelting:Young Female	1.298	-16.42 to 19.02	No	ns	>0.9999
Stoelting:Old Male vs. Stoelting:Old Female	-2.788	-19.27 to 13.70	No	ns	0.9995
Stoelting:Old Male vs. TopScan:Young Male	2.031	-15.69 to 19.75	No	ns	>0.9999
Stoelting:Old Male vs. TopScan:Old Male	-8.636	-24.81 to 7.540	No	ns	0.7133
Stoelting:Old Male vs. TopScan:Young Female	1.408	-16.31 to 19.13	No	ns	>0.9999
Stoelting:Old Male vs. TopScan:Old Female	-4.047	-20.53 to 12.44	No	ns	0.9945
Stoelting:Young Female vs. Stoelting:Old Female	-4.086	-22.09 to 13.92	No	ns	0.9966
Stoelting:Young Female vs. TopScan:Young Male	0.7333	-18.41 to 19.87	No	ns	>0.9999
Stoelting:Young Female vs. TopScan:Old Male	-9.934	-27.65 to 7.785	No	ns	0.6602
Stoelting:Young Female vs. TopScan:Young Female	0.11	-19.03 to 19.25	No	ns	>0.9999
Stoelting:Young Female vs. TopScan:Old Female	-5.345	-23.35 to 12.66	No	ns	0.9831
Stoelting:Old Female vs. TopScan:Young Male	4.819	-13.18 to 22.82	No	ns	0.9908
Stoelting:Old Female vs. TopScan:Old Male	-5.848	-22.33 to 10.64	No	ns	0.9547
Stoelting:Old Female vs. TopScan:Young Female	4.196	-13.81 to 22.20	No	ns	0.996
Stoelting:Old Female vs. TopScan:Old Female	-1.259	-18.04 to 15.53	No	ns	>0.9999
TopScan:Young Male vs. TopScan:Old Male	-10.67	-28.39 to 7.052	No	ns	0.5747
TopScan:Young Male vs. TopScan:Young Female	-0.6233	-19.76 to 18.52	No	ns	>0.9999
TopScan:Young Male vs. TopScan:Old Female	-6.078	-24.08 to 11.92	No	ns	0.9652
TopScan:Old Male vs. TopScan:Young Female	10.04	-7.675 to 27.76	No	ns	0.6476
TopScan:Old Male vs. TopScan:Old Female	4.589	-11.89 to 21.07	No	ns	0.9884
TopScan:Young Female vs. TopScan:Old Female	-5.455	-23.46 to 12.55	No	ns	0.981
Figure 4H
Fixed effects (type III)	P value	P value summary	Statistically significant (P < 0.05)?	F (DFn, DFd)
Apparatus	0.0059	**	Yes	F (1, 52) = 8.256
Age	0.0062	**	Yes	F (1, 38) = 8.407
Apparatus x Age	0.2341	ns	No	F (1, 38) = 1.462
Šídák's multiple comparisons test	Predicted (LS) mean diff.	95.00% CI of diff.	Below threshold?	Summary	Adjusted P Value
Young - Old
Stoelting	-3.906	-11.52 to 3.703	No	ns	0.4215
TopScan	-9.495	-17.11 to -1.886	Yes	*	0.0121
Figure 4I
Unpaired t test with Welch's correction
P value	0.0248
P value summary	*
Significantly different (P < 0.05)?	Yes
One- or two-tailed P value?	Two-tailed
Welch-corrected t, df	t=2.285, df=84.67
